# Supplementary material for: Investigating the Retained Inhibitory Effect of Cobimetinib against p.P124L Mutated MEK1: A Combined Liquid Biopsy and in Silico Approach
Source: MDPI journal article supplement (doi:10.3390/cancers14174153), 2022-08-27
Supplement: s1 [file s1]

**Supplementary Table S2.** Characteristics of longitudinal plasma samples and QC metrics of the NGS analysis

| SAMPLE ID | TOTAL (ng) | MEDIAN DEPTH | 1000X targets(%) | 500X bases (%) |
|-----------|------------|--------------|------------------|----------------|
| T0        | 45.00      | 3027         | 97.45            | 95.91          |
| T1        | 13.09      | 1744         | 96.73            | 90.49          |
| T2        | 38.36      | 3197         | 97.45            | 97.65          |
| T3        | 52.20      | 2041         | 96.29            | 96.54          |
|           |            |              |                  |                |
| MEDIAN    | 41.68      | 2534         | 97.09            | 96.22          |
|           |            |              |                  |                |
